# Supplementary material for: A New Electrode Design for Direct Bladder Wall Stimulation: A Pilot Minipig Study with Chronic Testing
Source: MDPI journal article supplement (doi:10.3390/app12031149), 2022-01-22
Supplement: s1 [file s1]

Archive with 1 entries (1 files):
- applsci-1547148-supplementary.pdf
